# Supplementary material for: Rapid screening mutations of first-line-drug-resistant genes in Mycobacterium tuberculosis strains by allele-specific real-time quantitative PCR
Source: PeerJ. 2019 Apr 1;7:e6696. doi: 10.7717/peerj.6696 (PMC6448557; doi:10.7717/peerj.6696)
Supplement: Supplemental Information 4 [file peerj-07-6696-s004.docx]

Table S1. Information of AS-PCR primers.

| Primer name | Annealing temperature | Primer sequence (5′-3′) *** | Product size | Detecting allele | Detection threshold |
| --- | --- | --- | --- | --- | --- |
| *KatG* 898G-F | 60 oC ** | AGCAGATGGGCTTGGACG | 156 bp | 898G  (condon 300) | 5 × 102 |
| *KatG* 898-R | TCTTCGTCAGCTCCCACTC |
| *KatG* 898T-F | GAGCAGATGGGCTTGGACT | 157 bp | 898T  (condon 300) |
| *KatG* 898-R | TCTTCGTCAGCTCCCACTC |
| *KatG* 906A-F | 65 oC | GGCTTGGGCTGGAAGTGA | 273 bp | 906A  (condon 302) | 104 |
| *KatG* 906-R * | ATCCACCCGCAGCGAGAG |
| *KatG* 906C-F | GGCTTGGGCTGGAAGATC | 273 bp | 906C  (condon 302) |
| *KatG* 906-R * | ATCCACCCGCAGCGAGAG |
| *KatG* 944C-F | 65 oC | TAAGGACGCGATCACGAC | 485 bp | 944C  (condon 315) | 5 × 102 |
| *KatG* 944-R * | TGAGACAGTCAATCCCGATG |
| *KatG* 944G-F | GTAAGGACGCGATCACGAG | 486 bp | 944G  (condon 315) |
| *KatG* 944-R* | TGAGACAGTCAATCCCGATG |
| *RpoB* 1576A-F | 55 oC | CGCTGTCGGGGTTTACCA | 464 bp | 1576A  (condon 526) | 5 × 102 |
| *RpoB* 1576-R | GTGCTCCAGGAAGGGAATCAT |
| *RpoB* 1576C-F | CGCTGTCGGGGTTGATCC | 464 bp | 1576C  (condon 526) |
| *RpoB* 1576-R | GTGCTCCAGGAAGGGAATCAT |
| *RpoB* 1576T-F | 60 oC | CGCTGTCGGGGTTGTCCT | 464 bp | 1576T  (condon 526) | 5 × 102 |
| *RpoB* 1576-R | GTGCTCCAGGAAGGGAATCAT |
| *RpoB* 1576C-F | CGCTGTCGGGGTTGATCC | 464 bp | 1576C  (condon 526) |
| *RpoB* 1576-R | GTGCTCCAGGAAGGGAATCAT |
| *RpoB* 1592T-F | 45 oC | CCACAAGCGCCGACTCTT | 448 bp | 1592T  (condon 531) | 104 |
| *RpoB* 1592-1R | GTGCTCCAGGAAGGGAATCAT |
| *RpoB* 1592C-F | CCACAAGCGCCGACAGTC | 446 bp | 1592C  (condon 531) |
| *RpoB* 1592-2R | GCTCCAGGAAGGGAATCAT |
| *RpoB* 1843A-F | 55 oC | ACGAGGAGGACCGCCATA | 195 bp | 1843A  (condon 615) | 5 × 102 |
| *RpoB* 1843-R | GCTCCAGGAAGGGAATCAT |
| *RpoB* 1843G-F | ACGAGGAGGACCGCTACG | 195 bp | 1843G  (condon 615) |
| *RpoB* 1843-R | GCTCCAGGAAGGGAATCAT |
| *RpsL* -6T-F | 60 oC | CGCCCAAGATAGAACGCT | 400 bp | -6T | 103 |
| *RpsL* -6-R | CATCAGCCCTTCTCCTTCTTAG |
| *RpsL* -6C-F | CGCCCAAGATAGAACGCC | 400 bp | -6C |
| *RpsL* -6-R | CATCAGCCCTTCTCCTTCTTAG |
| *RpsL* 128G-F | 60 oC | TGTACACCACCACTGCGAG | 206 bp | 128G  (condon 43) | 5 × 102 |
| *RpsL* 128-R | CTGCGTATCCAGCGAACC |
| *RpsL* 128A-F | TGTACACCACCACTGCGAA | 206 bp | 128A  (condon 43) |
| *RpsL* 128-R | CTGCGTATCCAGCGAACC |
| *RpsL* 263-F | 60 oC | CACCACCACTCCGAAGAAGC | 167 bp | 263G  (condon 88) | 103 |
| *RpsL* 263G-R | GCACACCAGGCAGGTCGC |
| *RpsL* 263-F | CTCCGAAGAAGCCGAACTC | 160 bp | 263A  (condon 88) |
| *RpsL* 263A-R | CGCACACCAGGCAGGTACT |
| *EmbB* 233-F | 55 oC | GGGCTGATTGGCTTTGTG | 151 bp | 233G  (condon 78) | 103 |
| *EmbB* 233G-R | GCACGGTGGCGGTAAAAC |
| *EmbB* 233-F | GGGCTGATTGGCTTTGTG | 151 bp | 233A  (condon 78) |
| *EmbB* 233A-R | GCACGGTGGCGGTAGAGT |
| *EmbB* 916-F | 60 oC | ACCACGCTGAAACTGCTG | 291 bp | 916G  (condon 306) | 5 × 102 |
| *EmbB* 916G-R | GTCGGCGACTCGGGCTAC |
| *EmbB* 916-F | ACCACGCTGAAACTGCTG | 291 bp | 916A  (condon 306) |
| *EmbB* 916A-R | GTCGGCGACTCGGGCTAT |
| *EmbB* 916-F | 65 oC | ACCACGCTGAAACTGCTG | 291 bp | 916T  (condon 306) | 5 × 102 |
| *EmbB* 916T-R | GTCGGCGACTCGGGCTAA |
| *EmbB* 916-F | ACCACGCTGAAACTGCTG | 291 bp | 916A  (condon 306) |
| *EmbB* 916A-R | GTCGGCGACTCGGGCTAT |
| *EmbB* 918C-F | 64 oC | CGGCTACATCCTGGTCATC | 349 bp | 918C  (condon 306) | 103 |
| *EmbB* 918-R * | ATAGGTGACCAGCGAGCC |
| *EmbB* 918G-F | GGCTACATCCTGGGCGTG | 196 bp | 918G  (condon 306) |
| *EmbB* 918-2R | ACAGCAGCAGCCAGCACA |
| *EmbB* 918A-F | 55 oC | GGCTACATCCTGGGCACA | 196 bp | 918A  (condon 306) | 103 |
| *EmbB* 918-2R | ACAGCAGCAGCCAGCACA |
| *EmbB* 918G-F | GGCTACATCCTGGGCGTG | 196 bp | 918G  (condon 306) |
| *EmbB* 918-2R | ACAGCAGCAGCCAGCACA |
| *EmbB* 1217-F | 60 oC | GACGCCAGTCTGTGGATGC | 202 bp | 1217C  (condon 406) | 5 × 102 |
| *EmbB* 1217C-R | AGCCGAGCGCGATGATAG |
| *EmbB* 1217-F | GACGCCAGTCTGTGGATGC | 202 bp | 1217G  (condon 406) |
| *EmbB* 1217G-R | AGCCGAGCGCGATGATAC |
| 16S 915-F | — | CGCACAAGCGGCGGAGCA | 104 bp | Inner control | — |
| 16S 1018-R | GCCACAAGGGAACGCCTATCT |

Note:

* Primers *KatG* 906-R, *KatG* 944-R, and *EmbB* 918-R were replaced by *KatG* 898-R, *KatG* 898-R, and, *EmbB* 918-2R in real-time PCR, respectively.

** Annealing temperature of real-time PCR is 67 oC.

*** The factitious allele mutations in primers were marked in red. The primers with two factitious nucleotides were for mutant alleles, while the primers with one factitious nucleotide were for wild- type alleles.
